# Supplementary material
Source: PubMed Central journal article supplement (PMC1366536)
Supplement: biophysj_105.061259_1.pdf [file biophysj_105.061259_1.pdf]

## Kinetic stability of intermolecular DNA quadruplexes

Elena E. Merkina and Keith R. Fox

### Supplementary Material

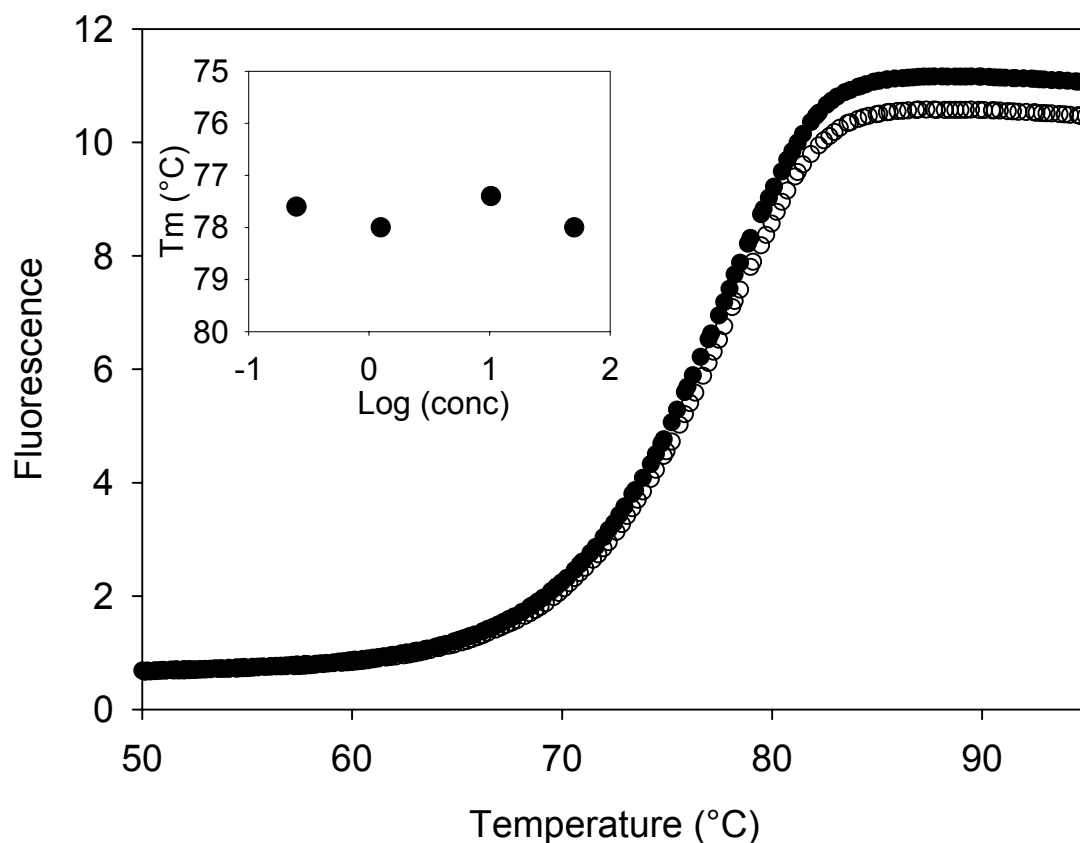

FIGURE S1. Effect of oligonucleotide concentration on the melting of FAM-GGGGT. These experiments were performed in 50 mM sodium phosphate pH 7.4 at a heating rate of 6 °C/min. (●) 0.25  $\mu$ M FAM-GGGGT, (○) 0.25  $\mu$ M FAM-GGGGT plus 50  $\mu$ M dTGGGGT. The inset shows the melting temperature ( $T_m$ ) as a function of the total oligonucleotide concentration ( $\mu$ M) (*i.e.* 0.25  $\mu$ M FAM-GGGGT plus 0, 1, 10 and 50  $\mu$ M dTGGGGT).
